# Supplementary material for: A sensitive non-enzymatic immunosensor composed of silver nanoflowers for squamous cell carcinoma antigen
Source: Royal Society of Chemistry journal article supplement (doi:10.1039/c6ra26438g), 2017-01-01
Supplement: c6ra26438g1.pdf [file c6ra26438g1.pdf]

**A sensitive non-enzymatic immunosensor composed of silver nanoflowers for Squamous cell carcinoma antigen**

Yueyun Li<sup>a,b</sup>, Yihe Zhang <sup>a\*</sup>, Jian Han<sup>b</sup>, Paul K. Chu<sup>c</sup> , Jinhui Feng<sup>b</sup>,  
Yunhui Dong<sup>b</sup>

a. Beijing Key Laboratory of Materials Utilization of Nonmetallic Minerals and Solid Wastes, National Laboratory of Mineral Materials, School of Materials Science and Technology, China University of Geosciences, Beijing, 100083, P. R. China

b. School of Chemical Engineering, Shandong University of Technology, Zibo, 255049, P. R. China

c. Department of Physics & Materials Science, City University of Hong Kong, Tat Chee Avenue, Kowloon, Hong Kong, China

\*: Corresponding author:

Email address: zyhcugb@163.com (YH Zhang)

Fax: +86-010-82323433

Tel: +86-010-82323433

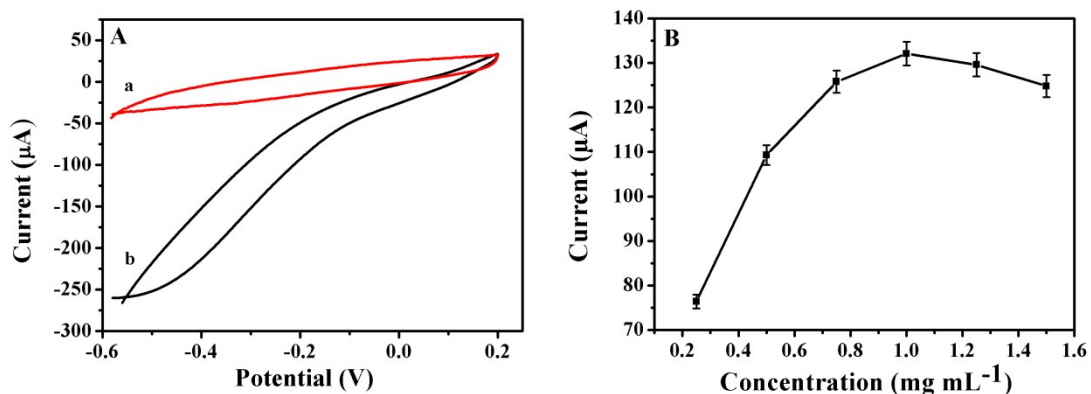

Fig. S1 (A) CVs of the immunosensor: using SNFs-NH<sub>2</sub>-MoS<sub>2</sub>/MWCNTs as label in PBS at pH=7.4 before (curve a) and after (curve b) the addition of 5 mmol·L<sup>-1</sup> H<sub>2</sub>O<sub>2</sub>; (B) the choice of concentration of SNFs-NH<sub>2</sub>-MoS<sub>2</sub>/MWCNTs

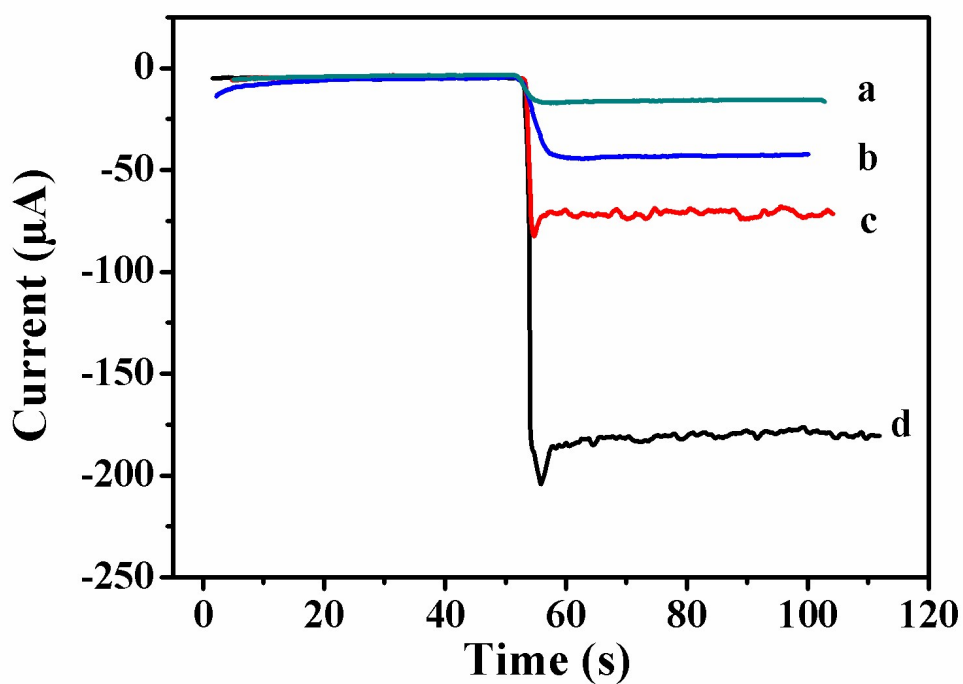

Fig. S2 Amperometric response of the immunosensor with different labels: (a)MWCNTs, (b) MoS<sub>2</sub>, (c) MoS<sub>2</sub>/MWCNT, and (d) SNFs-NH<sub>2</sub>-MoS<sub>2</sub>/MWCNT;

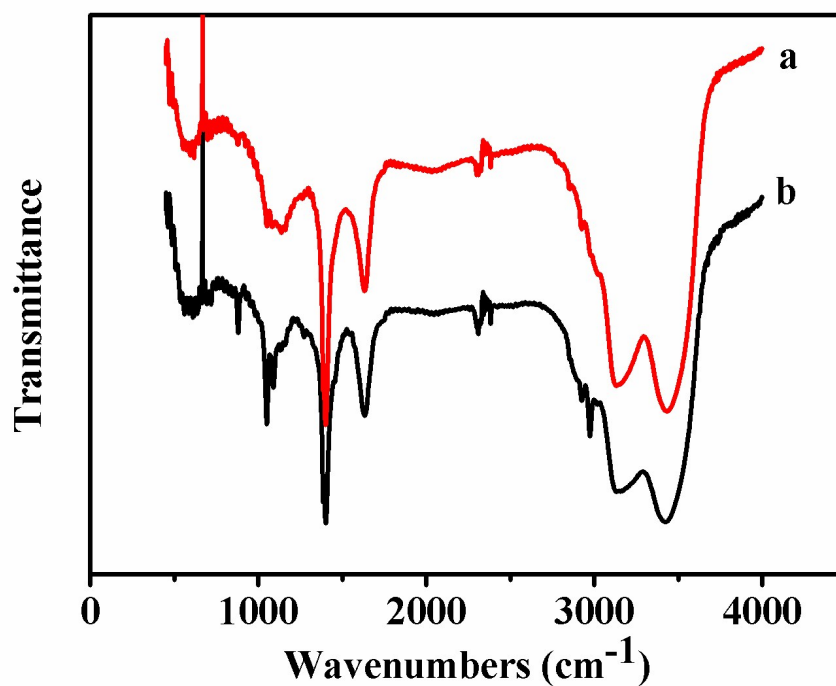

Fig. S3 FT-IR characterization of (a) SNFs-NH<sub>2</sub>-MoS<sub>2</sub>/MWCNTs, (b) Au NPs/ NH<sub>2</sub>-GNRs

Table S1. Comparing different methods of detecting SCCA

| Methods                                                              | Linear range<br>(ng mL <sup>-1</sup> ) | Limit of detection<br>(pg mL <sup>-1</sup> ) | References |
|----------------------------------------------------------------------|----------------------------------------|----------------------------------------------|------------|
| Pt-Fe <sub>3</sub> O <sub>4</sub> -Ab <sub>2</sub>                   | 0.05-18                                | 15.3                                         | 1          |
| Au/Ag/Au NPs- Ab <sub>2</sub>                                        | 0.0005-40                              | 0.18                                         | 2          |
| Pd-Au/C-Ab <sub>2</sub>                                              | 0.005-2                                | 1.7                                          | 3          |
| SNFs-NH <sub>2</sub> -MoS <sub>2</sub> /MWCNTSs<br>- Ab <sub>2</sub> | 0.0001-30                              | 0.03                                         | This work  |

Table S2. Application of the immunosensor to real samples.

| Content of<br>SCCA in<br>serum<br>(ng·mL <sup>-1</sup> ) | Addition content<br>(ng·mL <sup>-1</sup> ) | Detection content<br>(ng·mL <sup>-1</sup> ) | RSD (%<br>, n=5) | Recovery<br>(%) |
|----------------------------------------------------------|--------------------------------------------|---------------------------------------------|------------------|-----------------|
| 0.25                                                     | 0.50                                       | 0.71, 0.78, 0.73, 0.69,<br>0.74             | 6.78             | 96              |
|                                                          | 1.00                                       | 1.19, 1.23, 1.29, 1.28,<br>1.23             | 4.10             | 99.4            |
|                                                          | 5.00                                       | 5.34, 5.29, 5.18, 5.23,<br>5.22             | 1.26             | 100.04          |

## Reference

1. D. Wu, H. Fan, Y. Li, Y. Zhang, H. Liang and Q. Wei, *Biosensors and Bioelectronics*, 2013, 46, 91-96.
2. Y. Wang, Y. Zhang, Y. Su, F. Li, H. Ma, H. Li, B. Du and Q. Wei, *Talanta*, 2014, 124, 60-66.
3. J. Gao, B. Du, X. Zhang, A. Guo, Y. Zhang, D. Wu, H. Ma and Q. Wei, *Analytica chimica acta*, 2014, 833, 9-14.
